# Supplementary material for: Comparative Genomic Insights into Secondary Metabolism Biosynthetic Gene Cluster Distributions of Marine Streptomyces
Source: MDPI journal article supplement (doi:10.3390/md17090498), 2019-08-26
Supplement: s1 [file s1]

Table 1. Genomic information and quality estimations of marine *Streptomyces* obtained from NCBI GenBank database.

| Strain                                        | NCBI GenBank<br>assembly accession number | Isolation environment | Contigs | Size<br>(Mbp) | GC content<br>(mol%) | Completeness (%) | Contamination (%) |
|-----------------------------------------------|-------------------------------------------|-----------------------|---------|---------------|----------------------|------------------|-------------------|
| <i>Streptomyces abyssalis</i> SCSIO 10389     | GCA_001751345.1                           | Marine coral          | 45      | 6.91          | 70.3                 | 99.2             | 0.4               |
| <i>Streptomyces abyssalis</i> SCSIO 10390     | GCA_001751365.1                           | Marine coral          | 42      | 6.61          | 70.9                 | 99.5             | 0                 |
| <i>Streptomyces albidoflavus</i> 38           | GCA_002317005.1                           | Sea snail             | 1114    | 6.98          | 73.0                 | 99.7             | 1.0               |
| <i>Streptomyces albidoflavus</i> 132          | GCA_002289335.1                           | Sea snail             | 1053    | 6.80          | 73.0                 | 98.7             | 1.2               |
| <i>Streptomyces albidoflavus</i> 138          | GCA_002317025.1                           | Sea snail             | 1028    | 6.98          | 73.0                 | 98.8             | 0.4               |
| <i>Streptomyces albidoflavus</i> 143          | GCA_002317035.1                           | Sea snail             | 957     | 7.03          | 73.0                 | 99.2             | 0.2               |
| <i>Streptomyces albidoflavus</i> 145          | GCA_002289305.1                           | Sea snail             | 1153    | 6.52          | 73.0                 | 98.4             | 0.4               |
| <i>Streptomyces antioxidans</i> MUSC 164      | GCA_000968685.2                           | Mangrove              | 282     | 9.12          | 71.5                 | 100.0            | 4.2               |
| <i>Streptomyces avicenniae</i> NRRL B-24776   | GCA_000719135.1                           | Mangrove              | 66      | 6.48          | 73.5                 | 95.5             | 0.9               |
| <i>Streptomyces chilikensis</i> RC 1830       | GCA_001642695.1                           | Sediment              | 1484    | 4.87          | 69.8                 | 67.8             | 1.9               |
| <i>Streptomyces diastaticus</i> deep-sea A18  | GCA_002892485.1                           | Sediment              | 1377    | 7.71          | 71.7                 | 100              | 8.6               |
| <i>Streptomyces gilvigriseus</i> MUSC 26      | GCA_001879105.1                           | Mangrove              | 206     | 5.21          | 73.0                 | 94.7             | 0                 |
| <i>Streptomyces griseoaurantiacus</i> M045    | GCA_000204605.2                           | Sediment              | 46      | 7.71          | 72.7                 | 100.0            | 0                 |
| <i>Streptomyces humi</i> MUSC 119             | GCA_001005085.2                           | Mangrove              | 214     | 10.0          | 71.8                 | 100.0            | 0.2               |
| <i>Streptomyces hyaluromycini</i> NBRC 110483 | GCA_002217755.1                           | Sea grapes            | 52      | 11.5          | 71.1                 | 100.0            | 0.1               |
| <i>Streptomyces indicus</i> CGMCC 4.5727      | GCA_900100315.1                           | Sediment              | 45      | 8.23          | 71.4                 | 99.9             | 1.0               |
| <i>Streptomyces malaysiense</i> MUSC 136      | GCA_000980885.2                           | Mangrove              | 235     | 7.96          | 72.2                 | 99.6             | 0.3               |
| <i>Streptomyces mangrovisoli</i> MUSC 149     | GCA_000974985.2                           | Mangrove              | 199     | 9.16          | 72.5                 | 100.0            | 1.1               |
| <i>Streptomyces nanshensis</i> 10374          | GCA_001753705.1                           | Sediment              | 67      | 6.49          | 72.4                 | 98.8             | 0                 |
| <i>Streptomyces nanshensis</i> SCSIO 01066    | GCA_001751275.1                           | Sediment              | 2310    | 7.43          | 70.3                 | 100.0            | 9.3               |
| <i>Streptomyces nanshensis</i> SCSIO 10429    | GCA_001751255.1                           | Marine coral          | 731     | 7.72          | 71.6                 | 99.0             | 1.7               |
| <i>Streptomyces nanshensis</i> SCSIO M10372   | GCA_001751305.1                           | Sediment              | 114     | 10.27         | 70.9                 | 98.0             | 6.9               |
| <i>Streptomyces nanshensis</i> SCSIO M10399   | GCA_001751265.1                           | Sediment              | 1285    | 8.58          | 58.4                 | 91.4             | 9.0               |
| <i>Streptomyces nigra</i> 452                 | GCA_003074055.1                           | Sediment              | 1       | 7.64          | 71.9                 | 99.7             | 0.2               |
| <i>Streptomyces niveus</i> SCSIO 3406         | GCA_002009175.1                           | Sediment              | 1       | 7.99          | 70.5                 | 99.5             | 0.7               |
| <i>Streptomyces oceani</i> SCSIO 02100        | GCA_001751245.1                           | Sediment              | 166     | 6.31          | 70.4                 | 98.1             | 0.9               |
| <i>Streptomyces parvulus</i> 2297             | GCA_003344905.1                           | Mangrove              | 118     | 8.35          | 72.3                 | 100              | 1.4               |
| <i>Streptomyces philanthi</i> LHW51701        | GCA_003323715.1                           | Marine sponge         | 80      | 7.66          | 72.2                 | 99.6             | 1.4               |
| <i>Streptomyces pluripotens</i> MUSC 135      | GCA_000802245.2                           | Mangrove              | 1       | 7.35          | 69.9                 | 99.5             | 0.6               |
| <i>Streptomyces pluripotens</i> MUSC 137      | GCA_000816465.4                           | Mangrove              | 1       | 7.59          | 69.9                 | 99.5             | 0.6               |
| <i>Streptomyces qinglanensis</i> 172205       | GCA_003265665.1                           | Sediment              | 38      | 7.19          | 72.6                 | 98.9             | 1.0               |
| <i>Streptomyces qinglanensis</i> CGMCC 4.6825 | GCA_900111245.1                           | Sediment              | 34      | 7.17          | 72.7                 | 99.3             | 1.0               |
| <i>Streptomyces qinglanensis</i> SCSIO M10379 | GCA_001751375.1                           | Sediment              | 22      | 6.61          | 72.8                 | 98.8             | 0.3               |

|                                      |                 |               |      |       |      |       |     |
|--------------------------------------|-----------------|---------------|------|-------|------|-------|-----|
| <i>Streptomyces</i> sp. 13-12-16     | GCA_002114215.1 | Marine sponge | 1513 | 8.72  | 71.6 | 96.5  | 1.2 |
| <i>Streptomyces</i> sp. AA0539       | GCA_000297635.1 | Sediment      | 57   | 5.77  | 72.9 | 95.8  | 0.9 |
| <i>Streptomyces</i> sp. AA1529       | GCA_000280905.1 | Sediment      | 109  | 7.28  | 72.7 | 98.8  | 0.2 |
| <i>Streptomyces</i> sp. AVP053U2     | GCA_001469455.2 | Sea Squirt    | 183  | 7.76  | 71.9 | 100.0 | 1.2 |
| <i>Streptomyces</i> sp. B188M101     | GCA_002910985.1 | Marine sponge | 609  | 8.22  | 71.6 | 99.5  | 0.2 |
| <i>Streptomyces</i> sp. B226SN101    | GCA_002910935.1 | Marine sponge | 580  | 8.27  | 71.6 | 99.8  | 0.2 |
| <i>Streptomyces</i> sp. B9173        | GCA_002081495.1 | Seawater      | 133  | 8.77  | 71.8 | 100.0 | 0   |
| <i>Streptomyces</i> sp. BSE7F        | GCA_003122045.1 | Sediment      | 5    | 7.51  | 72.3 | 98.1  | 0.4 |
| <i>Streptomyces</i> sp. CB02366      | GCA_001905905.1 | Beach sand    | 44   | 7.37  | 72.5 | 99.9  | 0.3 |
| <i>Streptomyces</i> sp. CB02400      | GCA_001905725.1 | Beach sand    | 47   | 8.93  | 71.7 | 100.0 | 0   |
| <i>Streptomyces</i> sp. CB02414      | GCA_001905385.1 | Beach sand    | 19   | 7.99  | 72.0 | 100.0 | 0.6 |
| <i>Streptomyces</i> sp. CB02613      | GCA_002803175.1 | Beach sand    | 28   | 7.38  | 71.7 | 99.5  | 0   |
| <i>Streptomyces</i> sp. CMB-StM0423  | GCA_002847285.1 | Beach sand    | 1    | 8.03  | 73.1 | 100   | 1.3 |
| <i>Streptomyces</i> sp. CNQ431       | GCA_000797385.1 | Sediment      | 295  | 7.04  | 73.1 | 99.9  | 0.1 |
| <i>Streptomyces</i> sp. CNQ-509      | GCA_001011035.1 | Sediment      | 1    | 8.04  | 73.1 | 100.0 | 1.6 |
| <i>Streptomyces</i> sp. CNZ279       | GCA_002754675.1 | Seawater      | 2    | 7.97  | 71.1 | 97.0  | 1.4 |
| <i>Streptomyces</i> sp. CNZ306       | GCA_002797655.1 | Seawater      | 5    | 8.55  | 73.5 | 100   | 0.5 |
| <i>Streptomyces</i> sp. DUT11        | GCA_002848525.1 | Sediment      | 1    | 8.03  | 71.8 | 97.3  | 1.0 |
| <i>Streptomyces</i> sp. FM008        | GCA_002910815.1 | Marine sponge | 1369 | 6.48  | 72.7 | 96.4  | 0.8 |
| <i>Streptomyces</i> sp. GBA 94-10    | GCA_000495635.1 | Marine sponge | 2    | 7.22  | 73.0 | 99.9  | 0.1 |
| <i>Streptomyces</i> sp. H-KF8        | GCA_001672315.1 | Sediment      | 11   | 7.68  | 72.1 | 100.0 | 0.5 |
| <i>Streptomyces</i> sp. HNM0039      | GCA_003097515.1 | Marine sponge | 1    | 7.29  | 72.5 | 99.5  | 0.4 |
| <i>Streptomyces</i> sp. HNS054       | GCA_001044185.1 | Marine sponge | 117  | 7.45  | 72.4 | 99.6  | 0   |
| <i>Streptomyces</i> sp. JS01         | GCA_000743295.1 | Sediment      | 38   | 7.80  | 71.6 | 99.8  | 0.4 |
| <i>Streptomyces</i> sp. LHW50302     | GCA_003323735.1 | Marine sponge | 70   | 7.69  | 72.0 | 99.6  | 1.9 |
| <i>Streptomyces</i> sp. M10          | GCA_000800535.1 | Sediment      | 77   | 7.21  | 73.3 | 99.4  | 0   |
| <i>Streptomyces</i> sp. MP131-18     | GCA_001984575.1 | Sediment      | 10   | 7.96  | 72.0 | 97.4  | 1.6 |
| <i>Streptomyces</i> sp. MUSC 1       | GCA_001866665.1 | Sediment      | 218  | 10.25 | 71.5 | 99.9  | 1.4 |
| <i>Streptomyces</i> sp. MUSC 14      | GCA_001866675.1 | Sediment      | 174  | 10.27 | 71.3 | 100.0 | 1.4 |
| <i>Streptomyces</i> sp. MUSC 93      | GCA_001866645.1 | Sediment      | 166  | 7.02  | 69.9 | 99.4  | 1.8 |
| <i>Streptomyces</i> sp. MUSC 125     | GCA_000816485.1 | Sediment      | 164  | 7.66  | 70.0 | 99.5  | 0.4 |
| <i>Streptomyces</i> sp. NBRC 110027  | GCA_000829715.2 | Seawater      | 20   | 8.32  | 71.1 | 100.0 | 1.5 |
| <i>Streptomyces</i> sp. NBRC 110035  | GCA_000829695.1 | Seawater      | 89   | 7.51  | 71.8 | 100.0 | 0.8 |
| <i>Streptomyces</i> sp. NRRL B-24484 | GCA_000717715.1 | Seawater      | 186  | 8.86  | 73.8 | 99.5  | 1.8 |
| <i>Streptomyces</i> sp. NRRL B-24501 | GCA_000716085.1 | Seawater      | 448  | 11.56 | 68.0 | 83.7  | 0.5 |
| <i>Streptomyces</i> sp. NTK 937      | GCA_000698495.1 | Sediment      | 3    | 7.44  | 71.9 | 99.8  | 0.1 |
| <i>Streptomyces</i> sp. PCS3-D2      | GCA_000612545.1 | Sediment      | 27   | 7.48  | 72.0 | 99.9  | 0.5 |
| <i>Streptomyces</i> sp. PT12         | GCA_003311645.1 | Marine sponge | 296  | 6.92  | 72.9 | 96.1  | 1.6 |

|                                              |                 |                      |      |       |      |       |     |
|----------------------------------------------|-----------------|----------------------|------|-------|------|-------|-----|
| <i>Streptomyces</i> sp. PTY087I2             | GCA_001687325.1 | Sea squirt           | 83   | 8.16  | 71.5 | 99.8  | 0.5 |
| <i>Streptomyces</i> sp. PVA_94-07            | GCA_000495755.1 | Marine sponge        | 3    | 7.11  | 73.1 | 99.9  | 0.1 |
| <i>Streptomyces</i> sp. RV15                 | GCA_001514305.1 | Marine sponge        | 152  | 10.77 | 70.2 | 100   | 1.2 |
| <i>Streptomyces</i> sp. S063                 | GCA_002832675.1 | Sediment             | 1    | 7.61  | 71.5 | 99.0  | 0   |
| <i>Streptomyces</i> sp. SBT349               | GCA_001083795.1 | Marine sponge        | 691  | 8.06  | 72.7 | 95.1  | 1.1 |
| <i>Streptomyces</i> sp. ScaeMP-e10           | GCA_000373405.1 | Seawater             | 20   | 8.08  | 71.6 | 99.8  | 1.0 |
| <i>Streptomyces</i> sp. SCSIO_03032          | GCA_002128305.1 | Sediment             | 1    | 6.29  | 73.5 | 96.5  | 1.4 |
| <i>Streptomyces</i> sp. SHP22-7              | GCA_003573595.1 | Sediment             | 146  | 7.90  | 72.2 | 89.0  | 0.5 |
| <i>Streptomyces</i> sp. SM1                  | GCA_002910825.1 | Marine sponge        | 1057 | 8.06  | 71.1 | 99.9  | 0.3 |
| <i>Streptomyces</i> sp. SM5                  | GCA_002910895.1 | Marine sponge        | 496  | 7.61  | 71.7 | 99.8  | 0.8 |
| <i>Streptomyces</i> sp. SM8                  | GCA_000299175.2 | Sediment             | 11   | 7.14  | 73.2 | 96.2  | 0.4 |
| <i>Streptomyces</i> sp. SM9                  | GCA_002910795.1 | Marine sponge        | 1592 | 6.45  | 72.7 | 97.0  | 0.8 |
| <i>Streptomyces</i> sp. SM10                 | GCA_002910915.1 | Marine sponge        | 195  | 7.47  | 70.8 | 99.5  | 0.4 |
| <i>Streptomyces</i> sp. SM11                 | GCA_002910905.1 | Marine sponge        | 311  | 8.00  | 71.1 | 99.3  | 1.1 |
| <i>Streptomyces</i> sp. SM12                 | GCA_002910855.1 | Marine sponge        | 910  | 6.48  | 72.2 | 94.3  | 0.6 |
| <i>Streptomyces</i> sp. SM13                 | GCA_002910875.1 | Marine sponge        | 388  | 8.44  | 71.2 | 99.8  | 0.2 |
| <i>Streptomyces</i> sp. SM14                 | GCA_002910755.1 | Marine sponge        | 639  | 6.34  | 72.4 | 94.8  | 1.1 |
| <i>Streptomyces</i> sp. SM17                 | GCA_002910725.2 | Marine sponge        | 4    | 7.18  | 73.3 | 99.9  | 0.4 |
| <i>Streptomyces</i> sp. SM18                 | GCA_002910775.2 | Marine sponge        | 1    | 7.70  | 71.8 | 99.8  | 0.8 |
| <i>Streptomyces</i> sp. WZ.A104              | GCA_002382885.1 | Marine cyanobacteria | 189  | 8.12  | 71.2 | 99.7  | 1.5 |
| <i>Streptomyces spongiicola</i> 531S         | GCA_003402595.1 | Sediment             | 84   | 6.91  | 72.6 | 99.4  | 0   |
| <i>Streptomyces spongiicola</i> HNM0071      | GCA_003122365.1 | Marine sponge        | 1    | 7.18  | 72.4 | 99.4  | 0.2 |
| <i>Streptomyces violaceoruber</i> S21        | GCA_002082175.1 | Sediment             | 1    | 7.92  | 72.7 | 99.9  | 0.5 |
| <i>Streptomyces xiamenensis</i> 318          | GCA_000993785.2 | Sediment             | 1    | 5.96  | 72.0 | 95.8  | 0.5 |
| <i>Streptomyces xiaopingdaonensis</i> DUT180 | GCA_000262345.1 | Sediment             | 385  | 6.47  | 72.2 | 99.5  | 0.6 |
| <i>Streptomyces xinghaiensis</i> S187        | GCA_000220705.2 | Sediment             | 1    | 7.14  | 73.1 | 100.0 | 1.3 |

Table S2. Genomic annotations of marine *Streptomyces* by using RAST webserver.

| Strain                                    | ORFs | rRNA Genes | tRNA Genes |
|-------------------------------------------|------|------------|------------|
| <i>Streptomyces abyssalis</i> SCSIO 10389 | 6185 | 17         | 57         |
| <i>Streptomyces abyssalis</i> SCSIO 10390 | 5961 | 13         | 54         |
| <i>Streptomyces albidoflavus</i> 38       | 7006 | 8          | 66         |
| <i>Streptomyces albidoflavus</i> 132      | 6873 | 8          | 69         |
| <i>Streptomyces albidoflavus</i> 138      | 6973 | 8          | 70         |
| <i>Streptomyces albidoflavus</i> 143      | 6988 | 8          | 69         |

|                                               |       |    |    |
|-----------------------------------------------|-------|----|----|
| <i>Streptomyces albidoflavus</i> 145          | 6486  | 1  | 62 |
| <i>Streptomyces antioxidantans</i> MUSC 164   | 7845  | 6  | 61 |
| <i>Streptomyces avicenniae</i> NRRL B-24776   | 6234  | 2  | 53 |
| <i>Streptomyces griseoaurantiacus</i> M045    | 7108  | 5  | 66 |
| <i>Streptomyces humi</i> MUSC 119             | 9020  | 4  | 68 |
| <i>Streptomyces hyaluromycini</i> NBRC 110483 | 10681 | 4  | 72 |
| <i>Streptomyces indicus</i> CGMCC 4.5727      | 7667  | 6  | 63 |
| <i>Streptomyces malaysiense</i> MUSC 136      | 7529  | 3  | 66 |
| <i>Streptomyces mangrovisoli</i> MUSC 149     | 8266  | 6  | 68 |
| <i>Streptomyces nanshensis</i> 10374          | 5697  | 16 | 60 |
| <i>Streptomyces nanshensis</i> SCSIO 10429    | 7422  | 9  | 59 |
| <i>Streptomyces nigra</i> 452                 | 7114  | 18 | 68 |
| <i>Streptomyces niveus</i> SCSIO 3406         | 7285  | 18 | 64 |
| <i>Streptomyces oceani</i> SCSIO 02100        | 5650  | 3  | 56 |
| <i>Streptomyces parvulus</i> 2297             | 7914  | 5  | 63 |
| <i>Streptomyces philanthi</i> LHW51701        | 6875  | 8  | 58 |
| <i>Streptomyces pluripotens</i> MUSC 135      | 6813  | 18 | 67 |
| <i>Streptomyces pluripotens</i> MUSC 137      | 7068  | 18 | 67 |
| <i>Streptomyces qinglanensis</i> 172205       | 6605  | 3  | 58 |
| <i>Streptomyces qinglanensis</i> CGMCC 4.6825 | 6593  | 8  | 59 |
| <i>Streptomyces qinglanensis</i> SCSIO M10379 | 5783  | 15 | 58 |
| <i>Streptomyces</i> sp. 13-12-16              | 9414  | 6  | 68 |
| <i>Streptomyces</i> sp. AA0539                | 5305  | 3  | 55 |
| <i>Streptomyces</i> sp. AA1529                | 6716  | 5  | 58 |
| <i>Streptomyces</i> sp. AVP053U2              | 7334  | 9  | 68 |
| <i>Streptomyces</i> sp. B188M101              | 7958  | 20 | 66 |
| <i>Streptomyces</i> sp. B226SN101             | 7900  | 20 | 65 |
| <i>Streptomyces</i> sp. B9173                 | 8092  | 3  | 72 |
| <i>Streptomyces</i> sp. BSE7F                 | 7294  | 21 | 66 |
| <i>Streptomyces</i> sp. CB02366               | 6910  | 4  | 65 |
| <i>Streptomyces</i> sp. CB02400               | 8375  | 3  | 69 |
| <i>Streptomyces</i> sp. CB02414               | 7441  | 4  | 66 |
| <i>Streptomyces</i> sp. CB02613               | 6738  | 4  | 64 |
| <i>Streptomyces</i> sp. CMB-StM0423           | 7080  | 15 | 55 |
| <i>Streptomyces</i> sp. CNQ431                | 6603  | 3  | 47 |
| <i>Streptomyces</i> sp. CNQ-509               | 7223  | 15 | 56 |
| <i>Streptomyces</i> sp. CNZ279                | 7535  | 14 | 58 |
| <i>Streptomyces</i> sp. CNZ306                | 7461  | 17 | 58 |

|                                      |        |    |    |
|--------------------------------------|--------|----|----|
| <i>Streptomyces</i> sp. DUT11        | 8354   | 18 | 64 |
| <i>Streptomyces</i> sp. FM008        | 6863   | 14 | 65 |
| <i>Streptomyces</i> sp. GBA 94-10    | 6529   | 21 | 65 |
| <i>Streptomyces</i> sp. H-KF8        | 7182   | 18 | 66 |
| <i>Streptomyces</i> sp. HNM0039      | 6673   | 16 | 67 |
| <i>Streptomyces</i> sp. HNS054       | 7094   | 3  | 67 |
| <i>Streptomyces</i> sp. JS01         | 7291   | 4  | 71 |
| <i>Streptomyces</i> sp. LHW50302     | 7119   | 3  | 64 |
| <i>Streptomyces</i> sp. M10          | 6,514  | 2  | 54 |
| <i>Streptomyces</i> sp. MP131-18     | 7,360  | 2  | 54 |
| <i>Streptomyces</i> sp. MUSC 1       | 9,994  | 4  | 66 |
| <i>Streptomyces</i> sp. MUSC 14      | 10,218 | 4  | 67 |
| <i>Streptomyces</i> sp. MUSC 93      | 6,851  | 5  | 66 |
| <i>Streptomyces</i> sp. MUSC 125     | 7,328  | 4  | 66 |
| <i>Streptomyces</i> sp. NBRC 110027  | 7,616  | 9  | 66 |
| <i>Streptomyces</i> sp. NBRC 110035  | 7,113  | 14 | 65 |
| <i>Streptomyces</i> sp. NRRL B-24484 | 8,690  | 6  | 68 |
| <i>Streptomyces</i> sp. NTK 937      | 6,804  | 18 | 81 |
| <i>Streptomyces</i> sp. PCS3-D2      | 6,973  | 3  | 69 |
| <i>Streptomyces</i> sp. PT12         | 6,368  | 2  | 53 |
| <i>Streptomyces</i> sp. PTY08712     | 7,398  | 9  | 65 |
| <i>Streptomyces</i> sp. PVA_94-07    | 6,334  | 21 | 65 |
| <i>Streptomyces</i> sp. RV15         | 10,708 | 3  | 65 |
| <i>Streptomyces</i> sp. S063         | 7,330  | 18 | 65 |
| <i>Streptomyces</i> sp. SBT349       | 7,627  | 2  | 54 |
| <i>Streptomyces</i> sp. ScaeMP-e10   | 7,356  | 7  | 66 |
| <i>Streptomyces</i> sp. SCSIO_03032  | 5,654  | 10 | 54 |
| <i>Streptomyces</i> sp. SM1          | 8,483  | 19 | 68 |
| <i>Streptomyces</i> sp. SM5          | 7,325  | 16 | 65 |
| <i>Streptomyces</i> sp. SM8          | 6,783  | 4  | 60 |
| <i>Streptomyces</i> sp. SM9          | 6,931  | 18 | 63 |
| <i>Streptomyces</i> sp. SM10         | 7,059  | 30 | 67 |
| <i>Streptomyces</i> sp. SM11         | 7,838  | 13 | 68 |
| <i>Streptomyces</i> sp. SM13         | 8,329  | 16 | 66 |
| <i>Streptomyces</i> sp. SM17         | 6,517  | 21 | 66 |
| <i>Streptomyces</i> sp. SM18         | 7,025  | 18 | 67 |
| <i>Streptomyces</i> sp. WZ.A104      | 7,708  | 4  | 66 |
| <i>Streptomyces spongiicola</i> 531S | 6,416  | 5  | 63 |

|                                              |       |    |    |
|----------------------------------------------|-------|----|----|
| <i>Streptomyces spongiicola</i> HNM0071      | 6,577 | 18 | 65 |
| <i>Streptomyces violaceoruber</i> S21        | 7,179 | 18 | 65 |
| <i>Streptomyces xiamenensis</i> 318          | 5,547 | 15 | 55 |
| <i>Streptomyces xiaopingdaonensis</i> DUT180 | 6,267 | 2  | 47 |
| <i>Streptomyces xinghaiensis</i> S187        | 6,503 | 18 | 63 |
